# Supplementary material for: Impact of Marker Pruning Strategies Based on Different Measurements of Marker Distance on Genomic Prediction in Dairy Cattle
Source: MDPI journal article supplement (doi:10.3390/ani11071992), 2021-07-02
Supplement: s1 [file s1]

## Article

# Impact of Marker Pruning Strategies Based on Different Measurements of Marker Distance on Genomic Prediction in Dairy Cattle

Duanyang Ren, Jinyan Teng, Shuqi Diao, Qing Lin, Jiaqi Li and Zhe Zhang \*

## Supplementary Material

**Table S1.** Number of single nucleotide polymorphism (SNP) in each chromosome for high-density SNP data after quality control.

| Chromosome number | Number of SNP | Chromosome number | Number of SNP |
|-------------------|---------------|-------------------|---------------|
| 1                 | 22,375        | 16                | 10,871        |
| 2                 | 17,723        | 17                | 10,645        |
| 3                 | 16,768        | 18                | 9,803         |
| 4                 | 16,399        | 19                | 9,161         |
| 5                 | 14,817        | 20                | 10,381        |
| 6                 | 17,712        | 21                | 9,461         |
| 7                 | 15,351        | 22                | 9,039         |
| 8                 | 12,427        | 23                | 6,992         |
| 9                 | 13,933        | 24                | 8,870         |
| 10                | 14,003        | 25                | 6,387         |
| 11                | 15,217        | 26                | 7,231         |
| 12                | 11,299        | 27                | 6,238         |
| 13                | 8,874         | 28                | 6,408         |
| 14                | 9,762         | 29                | 6,459         |
| 15                | 11,147        |                   |               |

**Table S2.** The ratios or thresholds used in the physical distance (PhyD), genetic distance (GenD) and random distance (RanD) methods.

| SNP number levels | The ratio of selected markers (%) in the RanD method | The threshold of physical distance (bp) in the PhyD method | The threshold of $r^2$ in the GenD method |
|-------------------|------------------------------------------------------|------------------------------------------------------------|-------------------------------------------|
| 1k                | 0.3                                                  | 2500000                                                    | 0.00032                                   |
| 2k                | 0.6                                                  | 1200000                                                    | 0.00112                                   |
| 3k                | 0.9                                                  | 800000                                                     | 0.0025                                    |
| 4k                | 1.2                                                  | 600000                                                     | 0.0045                                    |
| 5k                | 1.5                                                  | 480000                                                     | 0.007                                     |
| 7k                | 2.1                                                  | 333333                                                     | 0.0155                                    |
| 10k               | 3                                                    | 225000                                                     | 0.045                                     |
| 15k               | 4.5                                                  | 140000                                                     | 0.18                                      |
| 20k               | 6                                                    | 105000                                                     | 0.43                                      |
| 30k               | 9                                                    | 65000                                                      | 0.78                                      |
| 50k               | 15                                                   | 35000                                                      | 0.975                                     |
| 75k               | 22.5                                                 | 19900                                                      | 0.9999                                    |
| 100k              | 30                                                   | 12000                                                      | -                                         |
| 200k              | 60                                                   | 3300                                                       | -                                         |

**Table S3.** Four scenarios of marker sets with the same mean and different variances for the physical distance between adjacent SNPs.

|            | mean     | variance     |
|------------|----------|--------------|
| Scenario 1 | 498816.6 | 63967021601  |
| Scenario 2 | 498539.2 | 86119095978  |
| Scenario 3 | 498123.8 | 142436000000 |
| Scenario4  | 498403.6 | 271461357847 |

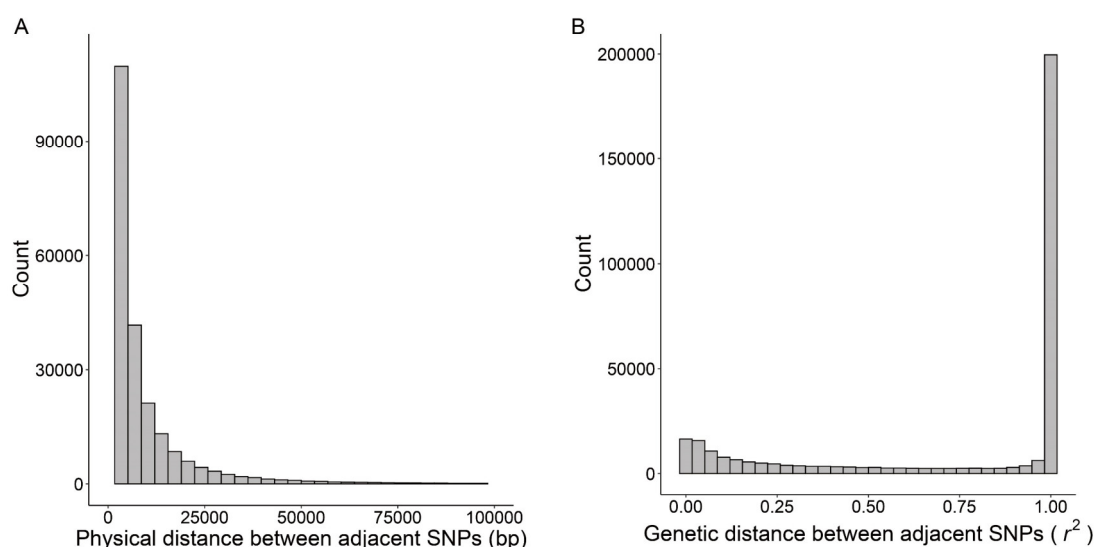**Figure S1.** The distribution of the physical distance (A) and genetic distance (B) between adjacent SNPs. The physical and genetic distances are expressed in base pairs (bp) and  $r^2$ , respectively.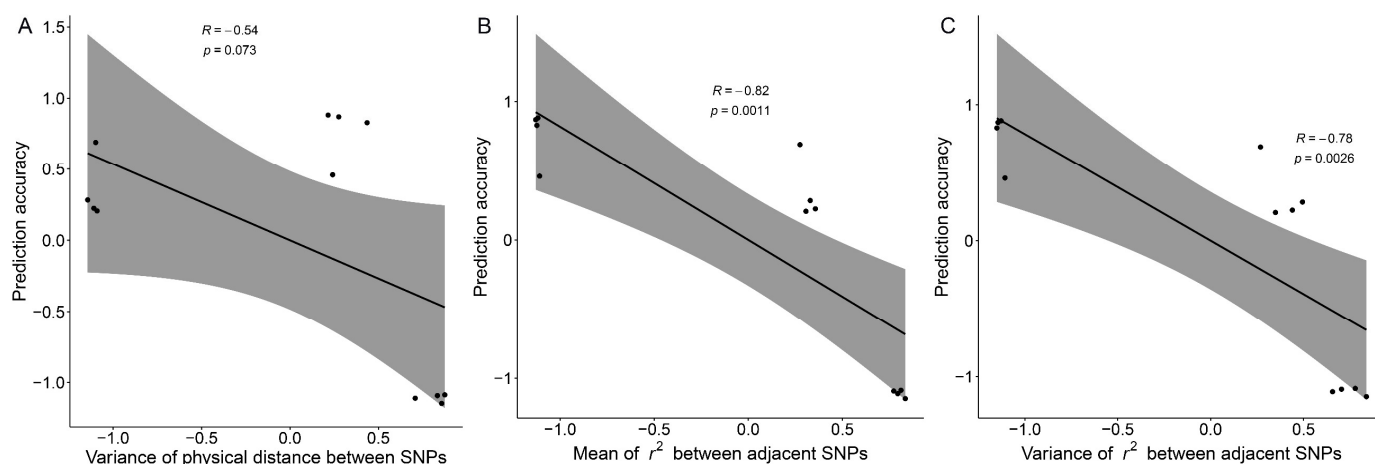**Figure S2.** The correlation tests between normalized marker density-related measurements and the normalized genomic prediction accuracy in SCS. Correlation tests were performed by combining normalized marker density-related measurements and normalized GEBV accuracies on 15–50 k SNPs panels. The correlation coefficient,  $P$ -value of the correlation coefficient generated by each correlation test were given in the plot. The correlation test results of variance of the physical distance between adjacent SNPs, the mean and variance of the  $r^2$  (genetic distance) between adjacent SNPs with GEBV accuracy are listed in (A–C) respectively.
